# Supplementary material for: A genetically engineered mouse model for ovarian hyperstimulation syndrome
Source: PeerJ journal article supplement (doi:10.7717/peerj.19531), 2025-05-26
Supplement: rawdata.zip [file rawdata.zip]

## Sheet: figure1a
mice	group	FSH before Dox	FSH after Dox
111	WT	3.11916	3.4229
104	WT	2.90888	2.3014
106	WT	2.86589	3.16963
103	WT	2.65561	2.04813
108	WT	2.38726	2.691
122	WT	2.17698	1.5695
101	WT	2.91068	3.21442
120	WT	2.7004	2.09292
117	WT	2.38726	2.691
105	FKI	3.98364	10.3014
112	FKI	2.9229	6.42757
118	FKI	3.73037	12.0481
129	FKI	1.66963	8.1743
109	FKI	3.25174	11.5695
123	FKI	1.191	8.69567
126	FKI	3.77516	12.0929
107	FKI	2.71442	9.21909
116	FKI	3.25174	11.5695
115	FKI	1.191	8.69567

## Sheet: figure1c
mice	group	weight（g)
ASS509-WT	wt	0.013
ASS508-WT	wt	0.005
ASS511-WT	wt	0.005
ASS488-WT	wt	0.006
ASS490-WT	wt	0.01
ASS507-FKI	FKI	0.104
ASS510-FKI	FKI	0.154
ASS491-FKI	FKI	0.06
ASS487-FKI	FKI	0.058
ASS489-FKI	FKI	0.098
ASS497-FKI	FKI	0.027

## Sheet: figure1f
mice	group	diameter(mean)
111	WT	83.87
101	WT	100
122	WT	96.77
103	WT	103.23
105	FKI	378.95
112	FKI	384.21
123	FKI	381.58
129	FKI	381.38

## Sheet: figure2a
mice	group	E2
46	WT	91.0284
99	WT	65.9472
81	WT	41.5964
56	WT	58.9413
96	WT	145.717
87	WT	41.5803
80	WT	30.8199
69	WT	38.4159
59	WT	85.5359
60	WT	47.8027
68	WT	41.1957
72	WT	38.9912
75	FKI	272.449
85	FKI	85.0883
83	FKI	90.8814
97	FKI	233.34
82	FKI	70.1191
98	FKI	154.394
43	FKI	50.3236
84	FKI	143.365
42	FKI	44.1833
45	FKI	74.2137

## Sheet: figure2b
mice	group	LH
ASS389	FKI	0.6561
ASS390		1.0396
ASS399		1.4015
ASS400		0.69725
ASS401		1.3094
ASS403		1.08385
ASS409		0.82305
ASS410		0.01254
ASS385	WT	0.00376
ASS386		0.0102
ASS396		0.00475
ASS397		0.00172
ASS405		0.01396
ASS406		0.00058
ASS407		0.00212
ASS408		0.01042

## Sheet: figure2c
mice	group	T
96	WT	0.444852
80		0.230429
56		0.388689
68		0.262054
46		0.411711
81		0.23914
69		0.249492
60		0.283617
99		0.334459
87		0.216607
42	FKI	0.337458
97		0.258852
85		0.353285
43		0.505457
75		0.445044
82		0.289152
84		0.508118
98		0.68105
83		0.595107
45		0.680454

## Sheet: figure2d
mice	group	T4
96	WT	1.41341
80	WT	1.34498
56	WT	1.27312
68	WT	1.48426
46	WT	0.99689
81	WT	1.13817
75	FKI	2.79789
82	FKI	2.7363
84	FKI	2.68397
98	FKI	3.39432
83	FKI	2.8232
45	FKI	2.47693

## Sheet: figure2e
mice	group	TSH
258	WT	6.18758
265	WT	10.4919
268	WT	7.35069
272	WT	9.0036
370	WT	6.04008
385	WT	44.9041
386	WT	14.9491
407	WT	9.27713
408	WT	19.5907
252	FKI	8.97183
271	FKI	7.6012
389	FKI	9.83053
390	FKI	19.7254
399	FKI	19.4121
400	FKI	10.3937
401	FKI	10.7341
403	FKI	8.13703
409	FKI	9.82168
410	FKI	8.01074

## Sheet: figure2f-i
mice	group	HCT	WBC10^9/L	LYM10^9/L	MON10^9/L	NEU10^9/L	EOS10^9/L	RBC10^12/L	PLT10^9/L		NEU/LYM	PLT/LYM	LYM/MON	NEU/PLT
384	WT	0.181	5.73	4.669	0.365	0.573	0.123	4.29	269		0.122724	57.6141	12.7918	0.00213011
389	WT	0.149	5.08	3.454	0.567	0.839	0.192	3.56	232		0.242907	67.1685	6.09171	0.00361638
397	WT	0.107	4.58	3.262	0.351	0.757	4.6	2.6	245		0.232066	75.1073	9.29345	0.0030898
398	WT	0.144	4.5	2.308	0.1026	0.601	0.08	3.48	242		0.260399	104.853	22.4951	0.00248347
402	WT	0.161	4.2	3.101	0.391	0.613	0.095	3.79	296		0.197678	95.4531	7.93095	0.00207095
405	WT	0.146	4.1	2.668	0.292	1.046	0.094	3.49	217		0.392054	81.3343	9.13699	0.00482028
406	WT	0.159	3.8	2.404	0.649	0.574	0.123	3.76	260		0.238769	108.153	3.70416	0.00220769
407	WT	0.157	3.17	2.351	0.298	0.461	0.06	3.74	238		0.196087	101.234	7.88926	0.00193697
408	WT	0.14	5.31	3.488	0.853	0.805	0.121	3.43	210		0.230791	60.2064	4.0891	0.00383333
390	FKI	0.159	3.71	2.868	0.189	0.868	3.97	3.69	159		0.30265	55.4393	15.1746	0.00545912
399	FKI	0.144	3.37	2.156	0.254	0.835	0.125	3.54	129		0.387291	59.833	8.48819	0.00647287
400	FKI	0.137	3.9	2.132	0.629	0.973	0.117	3.29	159		0.456379	74.5779	3.38951	0.0061195
401	FKI	0.145	2.12	1.37	0.114	0.505	0.131	3.47	140		0.368613	102.19	12.0175	0.00360714
403	FKI	0.13	2.34	1.374	0.195	0.652	0.119	3.1	148		0.474527	107.715	7.04615	0.00440541
409	FKI	0.148	4.92	3.009	0.317	1.444	0.15	3.66	148		0.479894	49.1858	9.49211	0.00975676
410	FKI	0.162	3.51	2.319	0.231	0.799	0.161	4.01	198		0.344545	85.3816	10.039	0.00403535

## Sheet: figure3a
The normalized absorbance values (optical density, OD) of ascites.
mice	group	OD
46	WT	0.0718333
60	WT	0.0636667
68	WT	0.0591667
72	WT	0.0708667
96	WT	0.0520333
87	WT	0.0687
80	WT	0.0631333
69	WT	0.0493333
59	WT	0.0627333
75	FKI	0.0680667
82	FKI	0.0881667
98	FKI	0.0969
43	FKI	0.106767
84	FKI	0.0638
42	FKI	0.0618667
45	FKI	0.0582667
86	FKI	0.0821

[truncated: 14 more sheets: figure3b, figure3c, figure3d, figure3e, figure3f, figure3g, figure3h,  figure4a-b, figure4c-d_x0009_,  figure 4e, figure4f, figure5b, figure5c, figure5d]
